# Supplementary material for: Enhancing the activity of a supported rhenium catalyst for cross-metathesis of ethene and 2-butene via promotion of boron
Source: Royal Society of Chemistry journal article supplement (doi:10.1039/d3cy01264f), 2023-01-01
Supplement: d3cy01264f1.pdf [file d3cy01264f1.pdf]

## Supplementary Material

# Enhancing the Activity of Supported Rhenium-catalyzed Cross-Metathesis of Ethene and 2-Butene *via* promotion of boron

Yibo Yang,<sup>‡abc</sup> Gaolei Qin,<sup>‡abc</sup> Anping Yin,<sup>abc</sup> Yuhang Cai,<sup>abc</sup> Ziyu Zhou,<sup>abc</sup> Nengfeng Gong,<sup>abc</sup> Xiangjie Zhang,<sup>abc</sup> Tao Yan,<sup>abc</sup> Gengzhe Song,<sup>b</sup> Xiaodong Sun,<sup>b</sup> Hongliu Wan,<sup>\*b</sup> Yong Yang,<sup>abc</sup> Yongwang Li<sup>abc</sup> and Zhi Cao<sup>\*abc</sup>

<sup>a</sup> State Key Laboratory of Coal Conversion, Institute of Coal Chemistry, Chinese Academy of Sciences, Taiyuan, 030001, China

<sup>b</sup> National Energy Center for Coal to Liquids, Synfuels China Co., Ltd., Beijing, 101400, China

<sup>c</sup> University of Chinese Academy of Sciences, Beijing, 100049, China

\* Corresponding author

‡ Yibo Yang and Gaolei Qin contributed equally to this work.

E-mail: wanhongliu@synfuelschina.com.cn (Hongliu Wan), caozhi@sxicc.ac.cn (Zhi Cao).

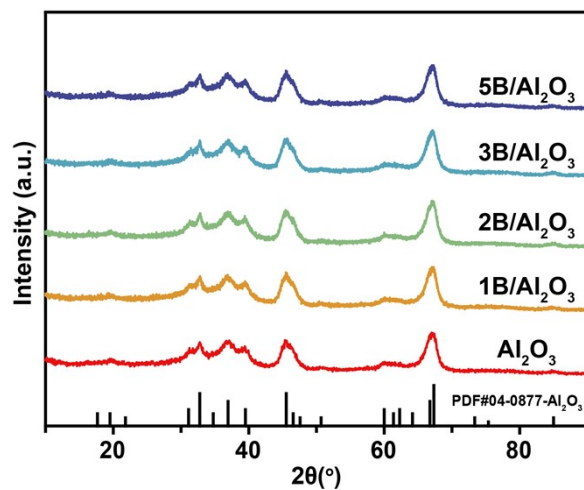

**Fig. S1.** XRD patterns of  $x\text{B}/\text{Al}_2\text{O}_3$  supports.

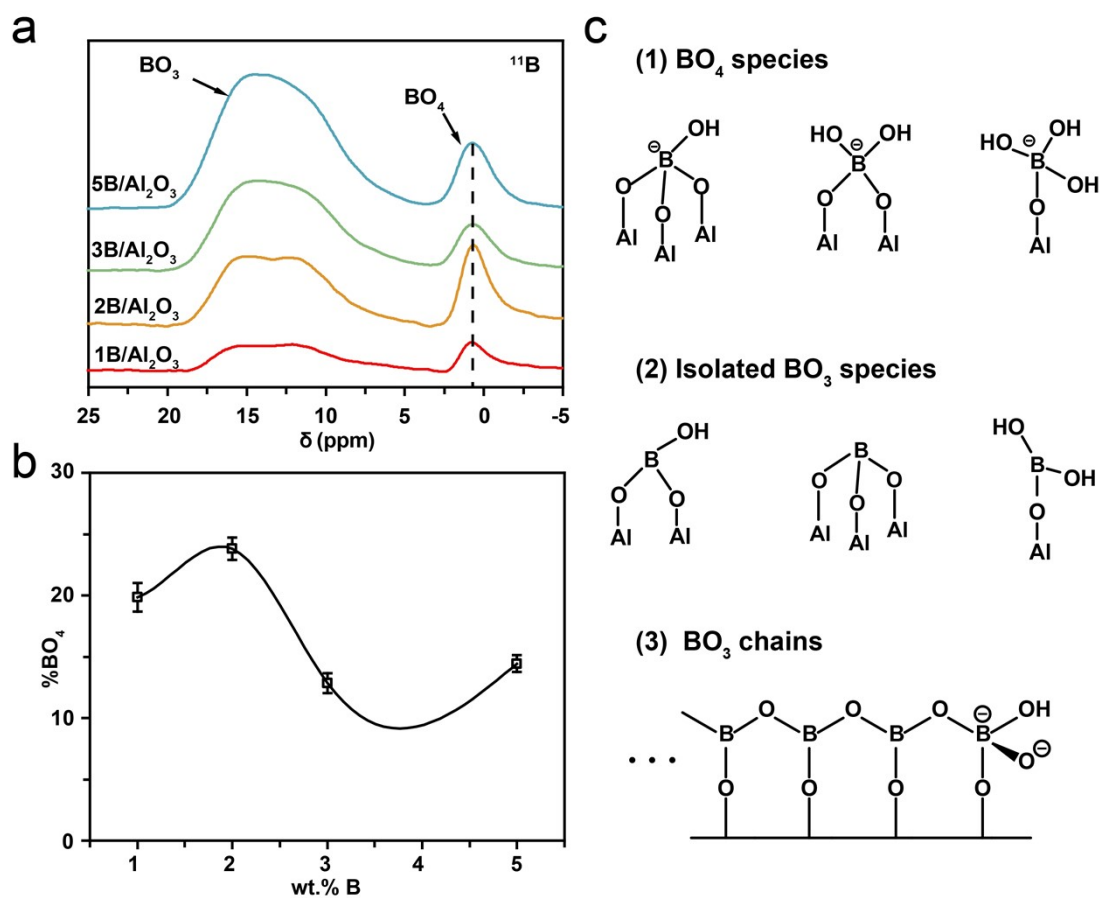

**Fig. S2.** (a)  $^{11}\text{B}$  MAS-NMR spectra illustrating the spectral region for the central transitions for the  $x\text{B}/\text{Al}_2\text{O}_3$  supports. (b) The fraction of  $\text{BO}_4$  species determined as  $I(\text{BO}_4)/\{I(\text{BO}_4) + I(\text{BO}_3)\}$ , as a function of the total boron content for the  $x\text{B}/\text{Al}_2\text{O}_3$ . (c) Schematic structures of  $\text{BO}_x$  species on an alumina surface.

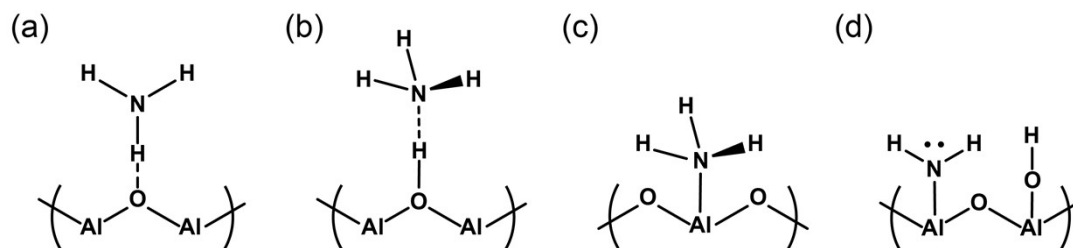

**Fig. S3.** Ammonia adsorption modes on acid sites: (a) Ammonia forms hydrogen bonds with surface oxygen atoms through its hydrogen (H) atoms. This is the weakest interaction mode. (b) Proton transferred from the surface hydroxyl group acting as a Brønsted acid site to the adsorbate. (c) The nitrogen atom of NH<sub>3</sub> coordinates with aluminum ions, which act as Lewis acid sites. (d) NH<sub>3</sub> undergoes dissociative adsorption, simultaneously forming a hydroxyl group, which stabilizes NH<sub>3</sub> on the solid surface.

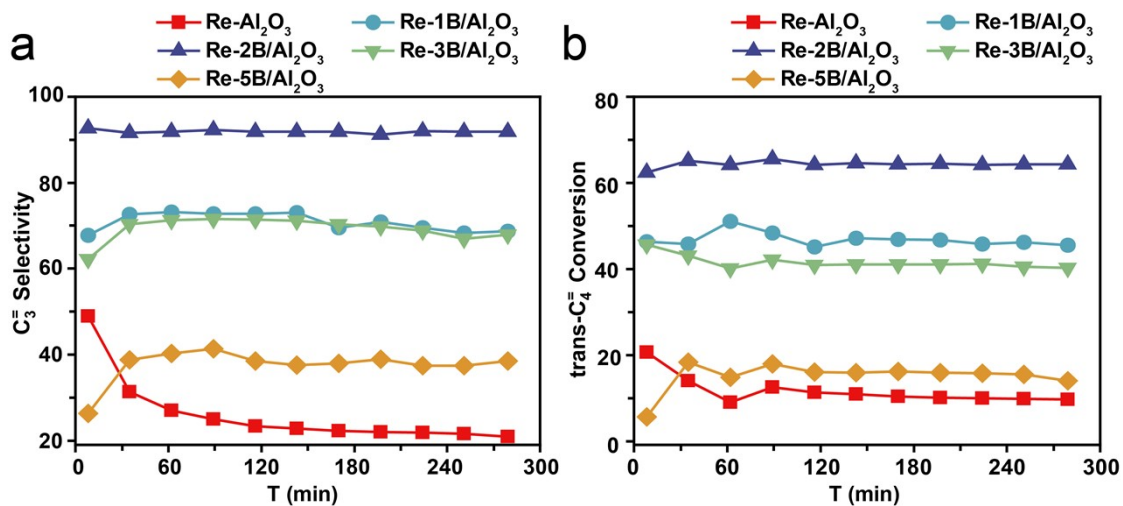

**Fig. S4.** (a) Time-on-stream selectivity of propene for Re-xB/Al<sub>2</sub>O<sub>3</sub> catalyzed metathesis of C<sub>2</sub><sup>-</sup> and trans-2-C<sub>4</sub><sup>-</sup>. (b) Time-on-stream conversion of 2-Butene for Re-xB/Al<sub>2</sub>O<sub>3</sub> catalyzed metathesis of C<sub>2</sub><sup>-</sup> and trans-2-C<sub>4</sub><sup>-</sup>.

**Table S1.** Comparison on the catalytic performance of metathesis over different rhenium catalysts.<sup>1-5</sup>

| Catalyst                                                | Substrates          | TOF/h <sup>-1</sup> | Reference                                                |
|---------------------------------------------------------|---------------------|---------------------|----------------------------------------------------------|
| Re-2B/Al <sub>2</sub> O <sub>3</sub>                    | ethane and 2-butene | 96.2                | This work                                                |
| Re-SiO <sub>2</sub> -Al <sub>2</sub> O <sub>3</sub>     | ethane and 2-butene | 64.1                | <i>ACS Catal.</i> , 2021, 11, 3530–3540                  |
| Re-ZSM-5                                                | propene             | 12.2                | <i>ACS Catal.</i> , 2021, 11, 2412–2421                  |
| Re/AlMCM-41                                             | ethane and 2-butene | 46.8                | <i>Catalysts.</i> , 2022, 12, 188.                       |
| Re-SiO <sub>2</sub> -Al <sub>2</sub> O <sub>3</sub> -Cl | 1-octene            | 10                  | <i>J. Catal.</i> , 2008, 258, 61-70.                     |
| Re/meso-Al <sub>2</sub> O <sub>3</sub>                  | 1-octene            | 39.7                | <i>Microporous Mesoporous Mater.</i> , 2004, 74, 93-103. |

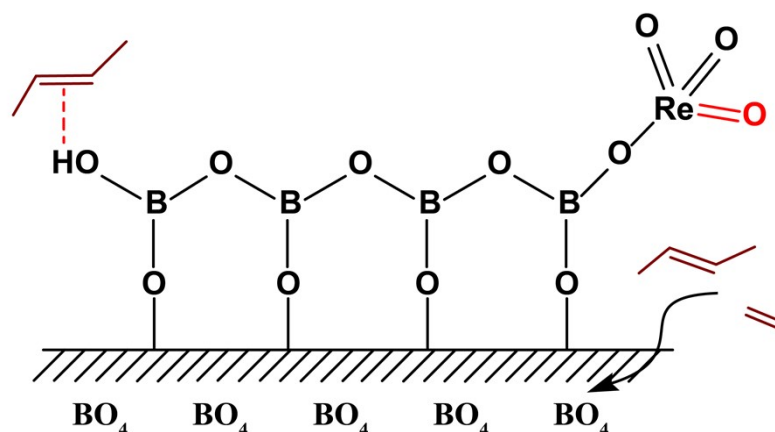

**Fig. S5.** The illustrative diagram on the  $\text{ReO}_x$ -B sites with high boron loading.

## Notes and references

1. P. Zhao, L. Ye, G. Li, C. Huang, S. Wu, P.-L. Ho, H. Wang, T. Yoskamtorn, D. Sheptyakov, G. Cibin, A. I. Kirkland, C. C. Tang, A. Zheng, W. Xue, D. Mei, K. Suriye and S. C. E. Tsang, *ACS Catal.*, 2021, **11**, 3530-3540.
2. B. Zhang, S. Lwin, S. Xiang, A. I. Frenkel and I. E. Wachs, *ACS Catal.*, 2021, **11**, 2412-2421.
3. M. Felischak, T. Wolff, L. Alvarado Perea, A. Seidel-Morgenstern and C. Hamel, *Journal*, 2022, **12**.
4. P. C. Bakala, E. Briot, Y. Millot, J.-Y. Piquemal and J.-M. Brégeault, *J. Catal.*, 2008, **258**, 61-70.
5. T. Oikawa, T. Ookoshi, T. Tanaka, T. Yamamoto and M. Onaka, *Microporous Mesoporous Mater.*, 2004, **74**, 93-103.
